# Supplementary material
Source: publisher figshare collection journal article supplement (https://plos.figshare.com/articles/dataset/_/1165027)

Figure S5

A

| Candidate Regulator | Direction | Domain           | cis -element | Family                      | Reference                            | OTX2-positive v negative t-test | Spearman's rho (p-value) |
|---------------------|-----------|------------------|--------------|-----------------------------|--------------------------------------|---------------------------------|--------------------------|
| Chd7*               | Activator | Inner Ear        | ND           | ATP-dependent helicase      | Hurd et al. 2010                     | 0.203                           | 0.30 (0.013)             |
| Oct4/Pou5f1         | Activator | ES cells         | ND           | POU Homeodomain             | Sharov et al. 2008                   | 0.524                           | 0.19 (0.011)             |
| Rax                 | Activator | Eye              | EYE          | Paired-type homeodomain     | Muranishi et al. 2011                | 0.968                           | 0.031 (0.051)            |
| Lef1*               | Activator | FB/MID           | FM1          | HMG domain (Wnt effector)   | Kurokawa et al. 2004a                | 0.994                           | 0.012 (0.14)             |
| Yy1                 | Activator | AN               | AN & V/M/C   | GLI-Krüppel                 | Takasaki et al. 2007                 | 0.643                           | 0.24 (0.20)              |
| Brn2                | Activator | FB/MID           | FM1          | POU Homeodomain             | Inoue et al. 2012                    | 0.618†                          | -0.17 (0.49)†            |
| Tcf7*               | Activator | FB/MID           | FM1          | HMG domain (Wnt effector)   | Kurokawa et al. 2004a                | 0.103†                          | -0.34 (0.43)†            |
| Sox2                | Activator | ES cells         | ND           | Sry Box HMG                 | Sharov et al. 2008                   | < 0.001†                        | -0.25 (0.27)†            |
| Smad3*              | Activator | AN               | ND           | Receptor-regulated Smad     | Jia et al. 2009                      | 0.0495†                         | -0.21 (.29)†             |
| Brn1                | Activator | FB/MID           | FM1          | POU Homeodomain             | Inoue et al. 2012                    | NA                              | 0 (0.0088)               |
| Brn4                | Activator | FB/MID           | FM1          | POU Homeodomain             | Inoue et al. 2012                    | NA                              | 0 (0.0088)               |
| Gbx2                | Repressor | Hindbrain        | FM1          | Homeodomain                 | Inoue et al. 2012                    | 0.125                           | -0.24 (0.051)            |
| Eed*                | Repressor | Posterior Embryo | ND           | Polycomb Group              | Schumacher et al. 1996               | 0.0640                          | -0.14 (0.56)             |
| Crx                 | Repressor | Eye              | DHS "R"      | OTX-like homeobox           | Hsiau et al. 2007, Corbo et al. 2010 | 0.161†                          | 0.24 (0.19)†             |
| Hes1*               | Repressor | Eye              | EYE          | Hes family (Notch effector) | Muranishi et al. 2011                | 0.534                           | 0.0026 (0.26)†           |
| Suz12*              | Repressor | ES Cells         | ND           | Polycomb Group              | Pasini et al. 2007                   | 0.151†                          | 0.32 (0.039)†            |
| Snail               | Repressor | Posterior Embryo | ND           | Zinc Finger                 | Carver et al. 2001                   | NA                              | 0 (0.0088)               |

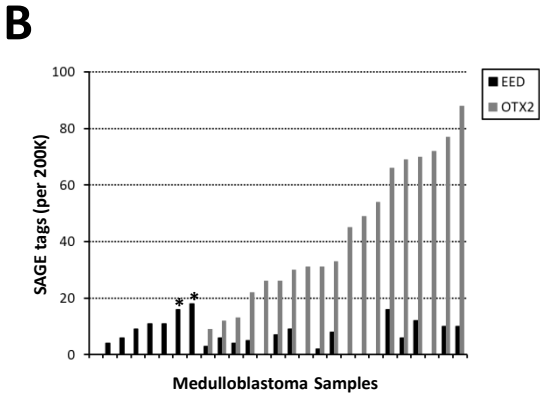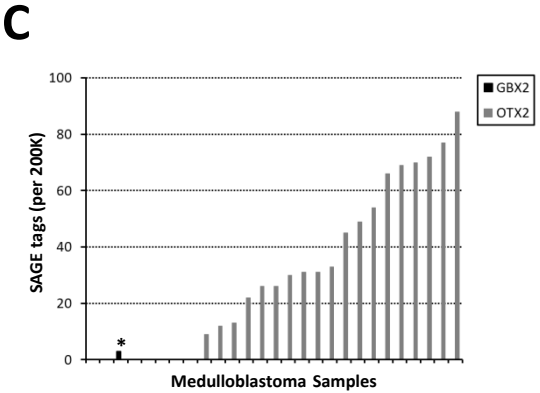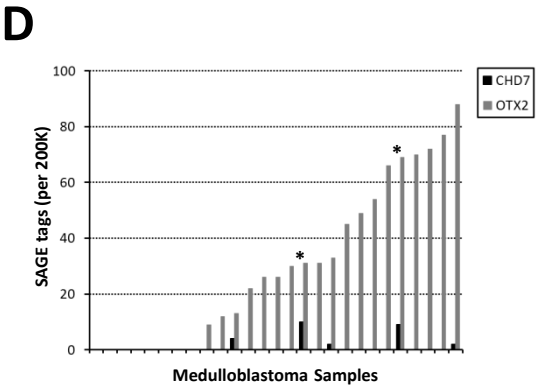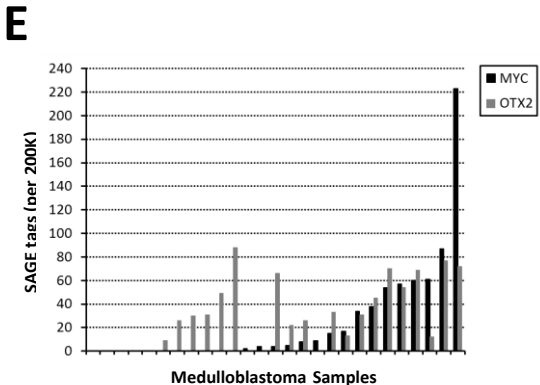

Supplement: Supplementary file 1 [file 1 › Figure_S5.pdf]
