# Supplementary material
Source: publisher figshare collection journal article supplement (https://plos.figshare.com/articles/dataset/_/1165027)

Figure S3

A

| Database                                | Rationale                              | # TF's represented | # Hits |
|-----------------------------------------|----------------------------------------|--------------------|--------|
| JASPAR CORE                             | Curated database of vertebrate motifs  | 130                | 8      |
| JASPAR HOMEO                            | Curated database of homeobox motifs    | 176                | 17     |
| TRANSFAC TFblast                        | Curated database of vertebrate motifs  | 398                | 0      |
| Consite                                 | Integrates conservation scores         | 130                | 0      |
| Manual alignment to motifs in Hu et al. | Confirmed <i>in vitro</i> interactions | 201                | 8      |
| Google Search                           | ID otherwise undocumented motifs       | ?                  | 9      |

B

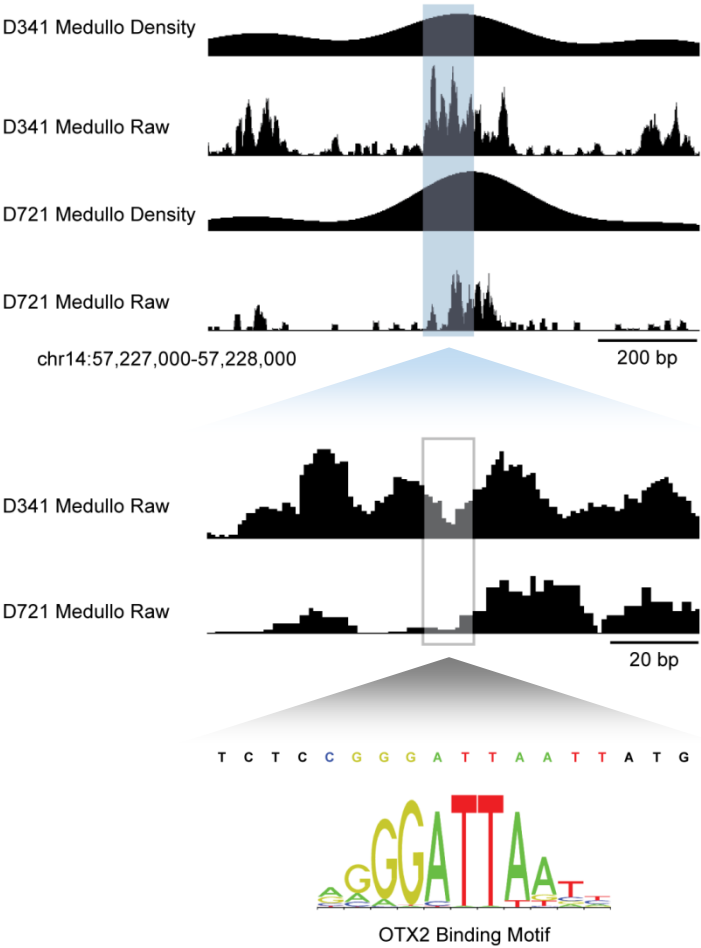

Supplement: Supplementary file 1 [file 1 › Figure_S3.pdf]
