# Supplementary material
Source: publisher figshare collection journal article supplement (https://plos.figshare.com/articles/dataset/_/1165027)
Supplement: Supplementary file 1 [file 1 › Table_S1.pdf]

Table S1

|                                         | DHS 1                 | DHS 2                 | DHS 3                     | DHS "R"                     | DHS 4                         | DHS 5                       | DHS 6                            | DHS 7                       |
|-----------------------------------------|-----------------------|-----------------------|---------------------------|-----------------------------|-------------------------------|-----------------------------|----------------------------------|-----------------------------|
| Coordinates (hg19, chr14)               | 57,197,081-57,197,624 | 57,208,951-57,209,448 | 57,218,296-57,218,708     | 57,221,649-57,222,405       | 57,227,265-57,227,738         | 57,261,971-57,262,522       | 57,276,973-57,277,519            | 57,278,349-57,278,688       |
| Position Rel. TSS (long isoform)        | +80,000               | +68,000               | +59,000                   | +55,000                     | +50,000                       | +15,000                     | 0                                | -1000                       |
| Differential Accessibility?             | Yes                   | No                    | Yes                       | Yes                         | Yes                           | Yes                         | Yes                              | Yes                         |
| Predicted Function *                    | Enhancer              | N.D.                  | Insulator                 | Strong Enhancer             | Enhancer                      | Enhancer                    | Active Promoter                  | Active Promoter             |
| Actual Function                         | Enhancer              | N.D.                  | Insulator                 | Inducible Repressor         | Enhancer                      | None Found                  | Promoter                         | Promoter/Enhancer           |
| Functional Specificity                  | No                    | N.D.                  | N.D.                      | N.D.                        | Yes                           | N.D.                        | No                               | No                          |
| Known Status in Human CNS               | RB DHS                | RB DHS                | No hypersensitivity       | RB DHS                      | RB DHS                        | RB DHS (weak)               | RB DHS                           | No hypersensitivity         |
| Known Status in Mouse CNS               | WB H3K4me1 (weak)     | N.D.                  | No histone marks or DHS's | WB & CB H3K4me1, WB H3K27Ac | WB H3K4me1, WB H3K27Ac (weak) | WB & CB H3K4me1, WB H3K27Ac | WB & CB H3K4me3, WB & CB H3K27Ac | WB H3K4me1, WB & CB H3K27Ac |
| Known TF Binding                        |                       |                       | CTCF (MB, RB, ES)         | CRX (eye)                   |                               |                             |                                  |                             |
| Conservation (Alignment)                | Xenopus (88%, 98bp)   | Xenopus (90%, 428bp)  | Mammals (86%, 256bp)      | Xenopus (86%, 52bp)         | Xenopus (100%, 42bp)          | Xenopus (80%, 159bp)        | Zebrafish (75%, 35bp)            | Mammals (95%, 335bp)        |
| Homology to Ms (% Identity)             | 94%                   | 94%                   | 86%                       | 90%                         | 92%                           | 90%                         | 90%                              | 95%                         |
| Homology to Ms (Location, chr14)        | 49,200,069-49,200,450 | 49,212,826-49,213,316 | 49,225,083-49,225,338     | 49,228,290-49,228,866       | 49,236,689-49,236,966         | 49,272,515-49,272,725       | 49,287,095-49,287,474            | 49,288,235-49,288,569       |
| Activity Detected in Mouse <sup>§</sup> | None                  | None                  | None                      | Nasal Cavity**              | Nasal Cavity**                | Nasal Placode               | N.D.                             | N.D.                        |

"Known Status in Mouse CNS" refers to E14.5 forebrain or adult cerebellum from Ref. 38.

"Conservation (Alignment)" identity comparisons with mammals use the mouse genome as a reference sequence

\*Based on classification system proposed in Ref. 39, predicted from histone status (H3K4me1, H3K4me3, H3K27Ac), DNase sensitivity, and CTCF binding in mouse embryonic whole brain or adult cerebellum from Ref. 38.

§Assessed (at embryonic timepoints only) in Refs. 11-13.

\*\*DHS 4 and DHS "R" reside in the in same fragment assayed

Abbreviations: CNS, central nervous system; Ms, mouse; WB, whole embryonic brain; CB, cerebellum; RB, retinoblastoma; MB, medulloblastoma
