# Supplementary material
Source: publisher figshare collection journal article supplement (https://plos.figshare.com/articles/dataset/_/1165027)
Supplement: Supplementary file 1 [file 1 › Table_S2.xls]

## Sheet: readme
Bisulfite-treated DNA spanning +200 to +2200bp from the OTX2 longform TSS was sequenced and each CpG site was scored based on extent of methylation (-4 least methylated and +4 most methylated)
Blank sites correspond to poor sequence reads
Figure 6A corresponds to Primers 4 and 5, which was most successfully amplified from bisulfite-treated DNA
Figure 6B places each tumor into either promoter-methylated (methylation score >0) or promoter-unmethylated (methylation score <0) categories based on Methylation by Site averages

## Sheet: Genomic Coordinates
Bisulfite Sequencing Primers	BSP L Primer	BSP R Primer	Genomic L Primer	Genomic R Primer	Coordinates Hg19	Relative longform TSS (approx)
Primer 2	TTTATGAGGTTGTAAGGTAAGTGTT	AAAAATCCCTAAAATCCATCCAAAC	CCCATGAGGCTGTAAGGTAAGTGTC	AAAGGTCCCTGGGATCCATCCAAAC	chr14:57276466-57276892	200-600 bp
Primer 3	GGATTTTAGGGATTTTTTTAGAGTT	AAACCACTAACTACCACTTCTACCC	GGATCCCAGGGACCTTTTTAGAGTC	GGGCCACTAGCTGCCACTTCTGCCC	chr14:57275932-57276482	600-1200 bp
Primer 4	TTTAGGTTTTAGGATAATGAGGTGT	CTATAAAAAAAACAAAAACCAACTC	CCCAGGCTCCAGGACAATGAGGTGT	CTGTGAAGGAAGCAAAAGCCAACTC	chr14:57275531-57275811	1300-1500 bp
Primer 5	GGGTGGTAGAGTTATTTGATTTTT	TTCCAAAAAACCCATCTACCAATTA	GGGTGGCAGAGTTATTTGATTCCC	TCCAAGAAGCCCATCTACCAGTTG	chr14:57274848-57275211	1900-2200 bp
Methylation-specific PCR
	Methylated-specific L Primer	Methylated-specific R Primer	Genomic L Primer	Genomic R Primer	Coordinates Hg19	Relative longform TSS (approx)
	TTTAGTATTTTTAATAGATCGATCGA	GAAAAAAACCCAAAACGACG	CCCAGTACCTCCAATAGACCGACCGA	GGGAGAAGCCCAGAACGGCG	chr14:57276530-57276813	350-650 bp
	Unmethylated-specific L Primer	Unmethylated-specific R Primer
	TTGAGTATTTTTAATAGATTGATTGA	CAAAAAAAACCCAAAACAACATT

## Sheet: Methylation by Site
	PRIMER 2																			PRIMER 3
	54	62	71	100	104	117	121	137	177	181	218	242	257	260	273	276	279	284	289	91	105	107	109	112	120	125	131	136	146	153	156	160	171	185	191	198	203	211	226	237	241	246	249	260	299	393	410	417	426
D384																				-4	-4	-4	-4	-4	-4	-4	-4	-4	-4																	-4	-4	-4	-4
D556																				-4	-4	-4	-4	-4	-4	-4	-4	-4	-4	-4	-4	-4	-4								-4	-4	-4	-4	-4	-4	-4	-4	-4
TB2226	-4	-4	-4	-4	-4	-4	-4	-4
TB2235
TB476																				-4	-4	-4	-4	-4	-4	-4	-4	-4	-4
TB54
TB771	-4	-4	-4	-4	-4	-4	-4	-4												-4	-4	-4	-4	-4	-4	-4	-4	-4																	-3	-4
TB876	-4	-4	-4	-4	-4	-2	-4	-4												-4	-4	-4	-4	-4	-4	-4	-4	-4	-4
Romeo 3N																				-4	-4	-4	-4	-4	-4	-4	-4	-4	-4
TB2222	-4	-4	-4	-3	-3	-3	-3	-4												-4	-4	-4	-4	-4	-4	-4	-4	-4																	-2
TB1377
D283	-1	-4	-4	-4	-4	-4	-4	-4	-4	-4	-4	0	0	-3	-4	-4	-4	-4	-4	-4	-4	-4	-4	-4	-4	-4	-4	-4	-4	-4	-4	-4	-4												-4	-4	-4	-4	-4
D721																				-4	-4	-4	-4	-4	-4	-4	-4	-4																	-2	-4	-3	-3	-3
TB2223	-4	-4	-4	-3	-4	-4	-4	-4	-4	-4	-4	-1	0	-3	-4	-4	-4			-4	-4	-4	-4	-4	-4	-4	-4	-4	-4				-4												-4	-4	-4	-2	-3
TB2227		-4	-4	-4	-4	-4	-4	-4	-4	-3	-4	-2	-2	-4	-4	-4	-4	-1	-1	-4	-4	-4	-4	-4	-4	-4	-4	-4																		-4	-4	-4	-4
TB2178	-4	-4	-4	-4	-4	-3	-3	-4	-4	-4	-4	-3	-2	-4	-4	-4	-4	0	-4	-4	-4	-4	-4	-4	-4	-4	-4	-4	-4																	-3	-3	-3	-3
D487																				-4	-4	-4	-4	-4	-4	-4	-4	-4	-4	-2	-3	-3	-2	-2	-3	-4	-3	-3	0	-4	-4	-4	-4	-4	-4	-4	-4	-4	-4
TB1339																				-4	-4	-4	-4	-4	-4	-4	-4	-4	-4	-3	-3	-4	-2	-4	-3	-4	-3	-4	-4	-3	-2	-3	-2	-3	-2	-2	-4	-1	-4
TB1961																				-4	-4	-4	-4	-4	-4	-4	-4	-4	-4	-4	-2	-4	-4	-3	-3	-3	-2	-3	-3	-3	-3	-3	1	-4	-3	-3	-3	-3	-4
D425		-4	-3	-2	-3	-2	-3	-2	-4	-3	-3	-2	-2	-4	-4	-4	-4	-1	-1	-4	-4	-4	-4	-4	-4	-4	-4	-4																		-4	-3	-1	-4
TB830	-4	-4	-4	-4	-4	0	0	0	-4	-3	-4	-4	-3	-4	-4	-2	-2	0	0
D341																				-4	-4	-4	-4	-4	-4	-4	-4	-4	-4	-4	-2	-4	-4	-3	-3	-3	-3	-3	-3	-3	-3	-3	0	-4	-1	-1	-2	-2	-4
TB2224	4	2	3	3	3	3	3	4	4	3	4	4	3	3	4	3	3	4	4	-2	-2	-2	-2	-2	-1	-1	0	0	1	4	3
MHH1	4	2	3	3	3	3	2	0	-4	0	3	4	3	4	2	3	4	3	3	4	4	4	4	4	2	4	2	2	0	-3	-1	-4	-2	-2	4									2	-1	2	-1	1	0
TB1341		3	3	3	3	4	3	4	4	3	4	4	4	4	4	4	4			2	2	3	3	3	1	2	3	3
D324	3	4	1	3	3	3	4	4	4	2	2	4	4	4	4	4	3	4	4	4	4	4	4	4	4	4	4	4	4	3	3	3	1	3	3	4	3	4	3	3	4	4	3	4	4	4
D581	4	2	2	3	3	4	4	4	4	3	4	4	3	3	4	3	3	4	4	-1	0	0	1	0	1	1	2	1	3	3	3	3	4	4	4	4	4	4	4	4	4	3	4	4	4	3	4	4	3
UW228	4	3	3	3	3	3	2	2	2	3	4	4	3	3	3	4	4	1	4	3	4	4	4	4	4	4	4	4	4	3	4	2	3	0	4	4	4	3	4	3	4	4	4	4	3	2	4	3	3
TB1423		4	4	4	4	4	4	4	4	4	4	4	4	4	4	4	4	3	4	4	4	4	4	4	3	3	3	3	4	3	3	3	3	3	3	3	3	3	3	4	4	3	3	3		4	2	3
MCD-1	4	4	4	4	4	3	2	2	3	3	4	4	4	4	3	4	4	4	4	3	4	4	4	4	4	4	4	4	4	3	3	2	4	4	4	4	4	4	4	3	4	4	4	4		4	4	4	4
TB2025	4	4	3	3	4	4	4	4	4	4	4	-4	3	4	4	4	4	4	4	4	4	4	4	4	4	4	4	3	4	4	4	4	4												4	4	4	4	4
TB2228	4	4	4	4	3	3	3	4	4	4	4	4	4	4	4	4	4	4		4	4	4	4	2	3	4	3	4	4	4	4	3	3	3	4	3	3	3	4	4	4	4	3	3	4	3	4	4
TB100		4	4	4	4	4	4	4	4	3	4	4	3	3	3	3	4	4	4	4	4	4	4	4	4	4	4	4	4	4	4	4	4	4	4	4	4	4	4	4	4	4	4	4		4	4	4	4
[truncated: 36 more columns]

## Sheet: Correlation
	MSP methylation status	BSP methylation status	OTX2 expression level (qPCR relative to normal cerebellum)
D384	U	-4	42.83
D556	U	-4	35.59
TB2226	U	-4	57.57
TB2235	U	-4	124.68
TB476	U	-4	328.43
TB54	ND	-4	37.93
TB771	U	-3.97917	3.19
TB876	U	-3.95745	0.17
Romeo 3N	ND	-3.94444	0
TB2222	U	-3.86667	0.91
TB1377	U	-3.84615	54.05
D283	U	-3.83099	56.76
D721	U	-3.81818	90.62
TB2223	U	-3.81818	85.36
TB2227	U	-3.8	100.5
TB2178	U	-3.79032	18.1
D487	U	-3.65574	128
TB1339	U	-3.59016	39.49
TB1961	U	-3.54902	53.68
D425	BOTH	-3.44231	72.17
TB830	U	-3.33333	44.09
D341	U	-2.72549	13.1
TB2224	BOTH	-0.933333	1.5
MHH1	M	1.40278	0.01
TB1341	BOTH	2.51163	0.31
D324	M	3.13889	0.1
D581	BOTH	3.2375	0.91
UW228	M	3.39759	0
TB1423	M	3.6	0
MCD-1	M	3.61538	0.01
TB2025	M	3.61972	0.18
TB2228	M	3.68421	0.02
TB100	M	3.72973	0.05
			-0.5755	Spearman's rho
			0.0005	p-value (Spearman's)
			60.3791	Avg OTX2 expression methylated
			0.159	Avg OTX2 expression unmethylated
			0.0111871	T-test, OTX2 expression methylated v unmethylated
ND, not determined
