# Supplementary material
Source: publisher figshare collection journal article supplement (https://plos.figshare.com/articles/dataset/_/1165027)
Supplement: Supplementary file 1 [file 1 › Table_S3.xlsx]

## Sheet: Sheet1
	Domain	Abbreviated Domain*	Mouse Coordinates (mm9)	Human Coordinates (hg18)	Ref.
	Telencephalon, dorsal diencephalon	N/A**	No Homology	chr14:44199331-44199388	Kimura-Yoshida et al. 2004
	Pretectum, mesencephalon, cranial nerves, trigeminal ganglion	F	chr14:49076383-49076677	chr14:57057377-57057670	Kimura-Yoshida et al. 2004
	Forebrain†	F	chr14:49132275-49133701	chr14:57114832-57116100	Visel et al. 2007
	Ventral diencephalon, dorsal mesencephalon	FM	chr14:49158692-49159432	chr14:57153797-57154340	Kurokawa et al. 2004b
	Forebrain/midbrain	FM	chr14:49160337-49160536	chr14:57154615-57157854	Kurokawa et al. 2004a
	Eye (weak)	EYE	chr14:49248337-49249570	chr14:57241212-57241493	Emerson and Cepko, 2011
	Anterior visceral endoderm, anterior mesendoderm, cephalic mesenchyme, eye	V/M/C	chr14:49282524-49283362	chr14:57272174-57273862	Kimura et al. 1997
	Eye	EYE	chr14:49284625-49285224	chr14:57274776-57275187	Emerson and Cepko, 2011
	Eye	EYE	chr14:49298449-49298850	chr14:57287994-57288366	Muranishi et al. 2011
	Forebrain†	F	chr14:49329525-49329976	chr14:57323044-57323378	Visel et al. 2007
	Forebrain/midbrain	FM1	chr14:49356857-49358223	chr14:57354973-57355383	Kurokawa et al. 2004a
	Midbrain†	M	chr14:49360625-49361301	chr14:57357879-57358462	Visel et al. 2007
	Epiblast, anterior neuroectoderm	AN/EPI	chr14:49372802-49375088	chr14:57369134-57370625	Kurokawa et al. 2004b
	Telencephalon, dorsal diencephalon, branchial arches	F	chr14:49419130-49421113	chr14:57419490-57419609	Kimura-Yoshida et al. 2004
	Midbrain†	M	chr14:49434775-49435476	chr14:57431383-57431985	Visel et al. 2007
	Midbrain†	M	chr14:49472015-49476289	chr14:57474933-57475728	Visel et al. 2007
	*As mapped in Figures S1A and S4. See Figure Legends S1A and S4 for abbreviation definitions.
	**Outside of viewing window for either figure
	†Identified based on p300 binding as indicated by ChIP-seq
