# Supplementary material
Source: publisher figshare collection journal article supplement (https://plos.figshare.com/articles/dataset/_/1165027)

# Figure S2

**A**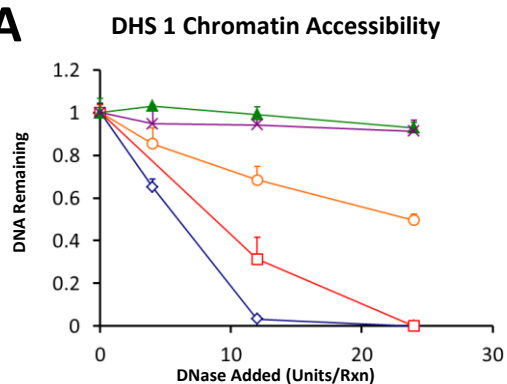**B**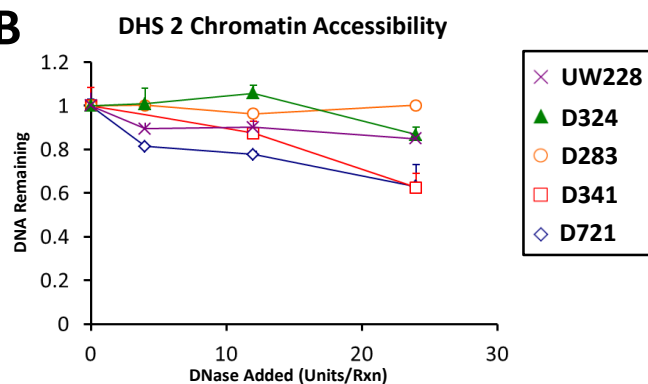**C**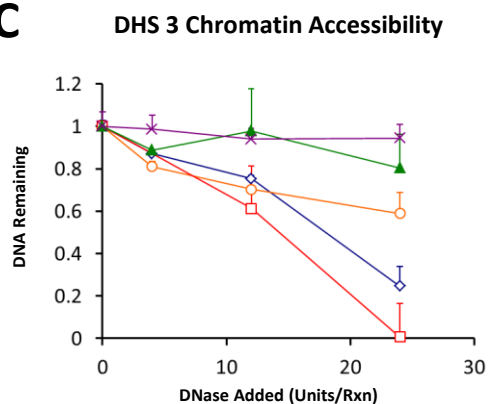**D**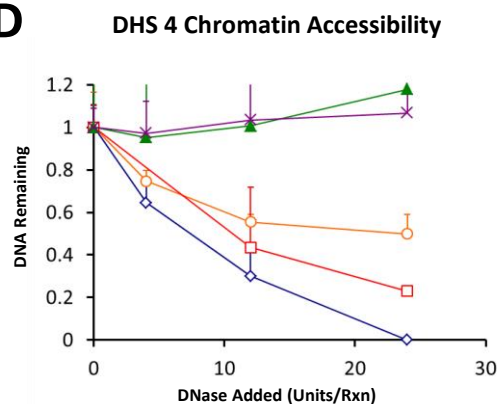**E**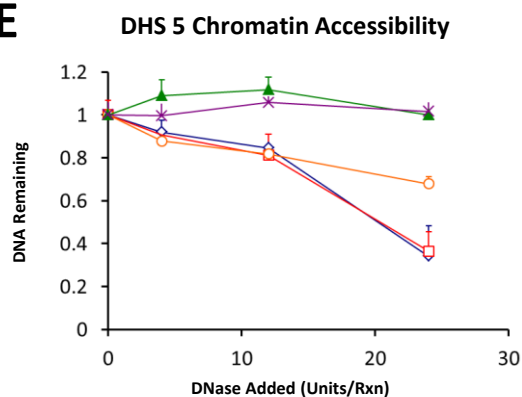**F**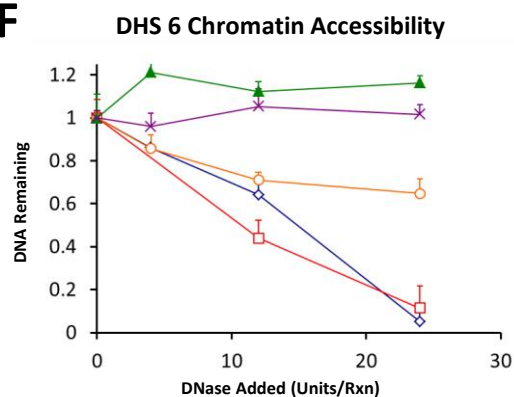**G**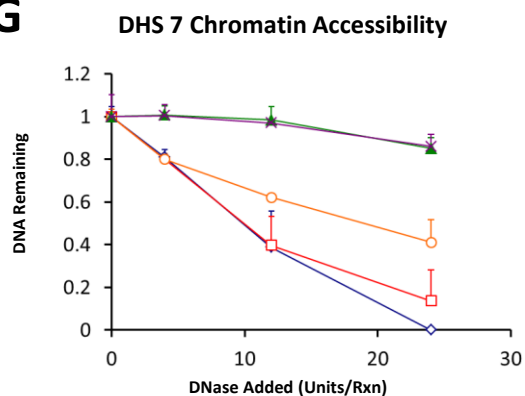**H**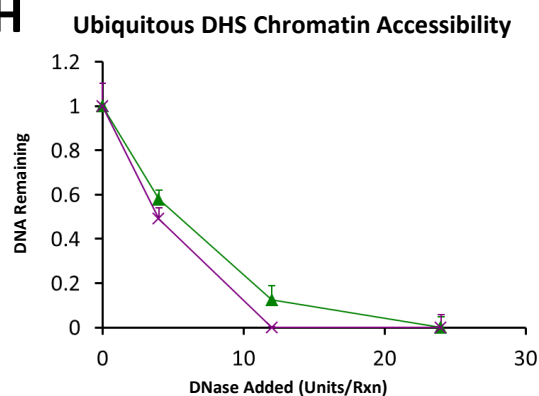

Supplement: Supplementary file [file 1]
