# Supplementary material
Source: publisher figshare collection journal article supplement (https://plos.figshare.com/articles/dataset/_/1165027)

# Figure S1

**A**

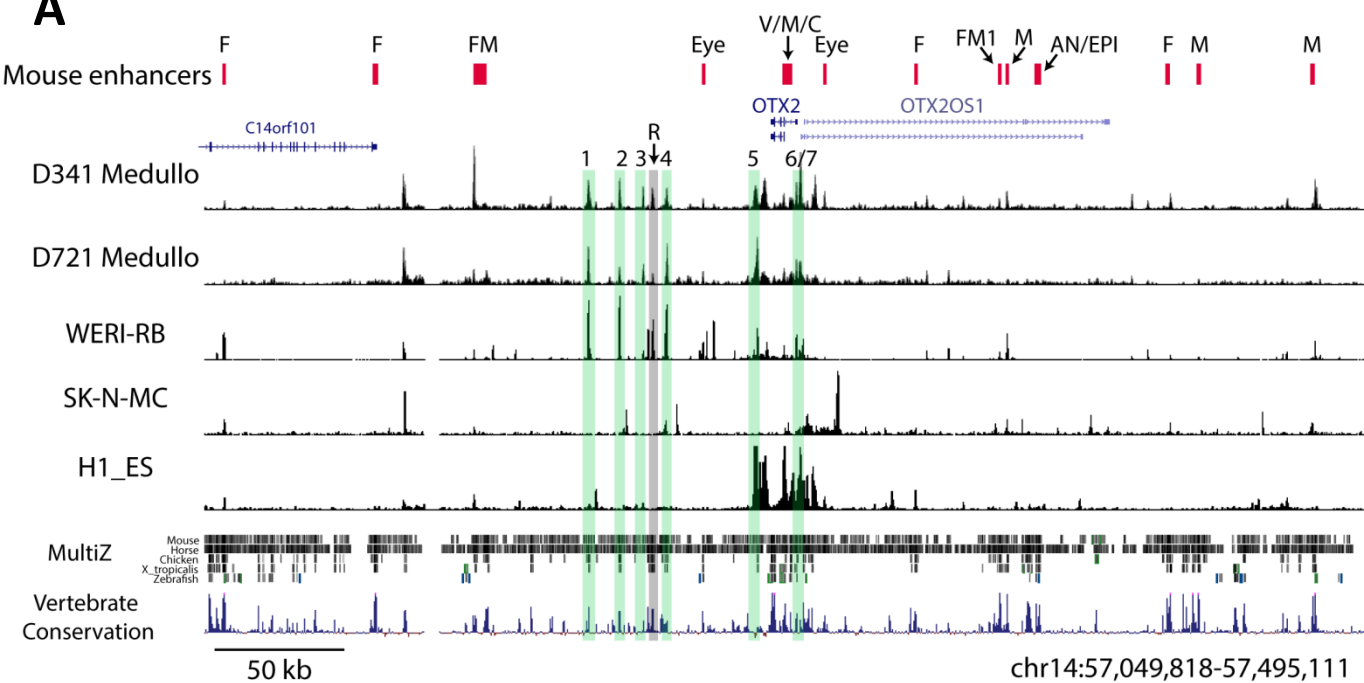

**B**

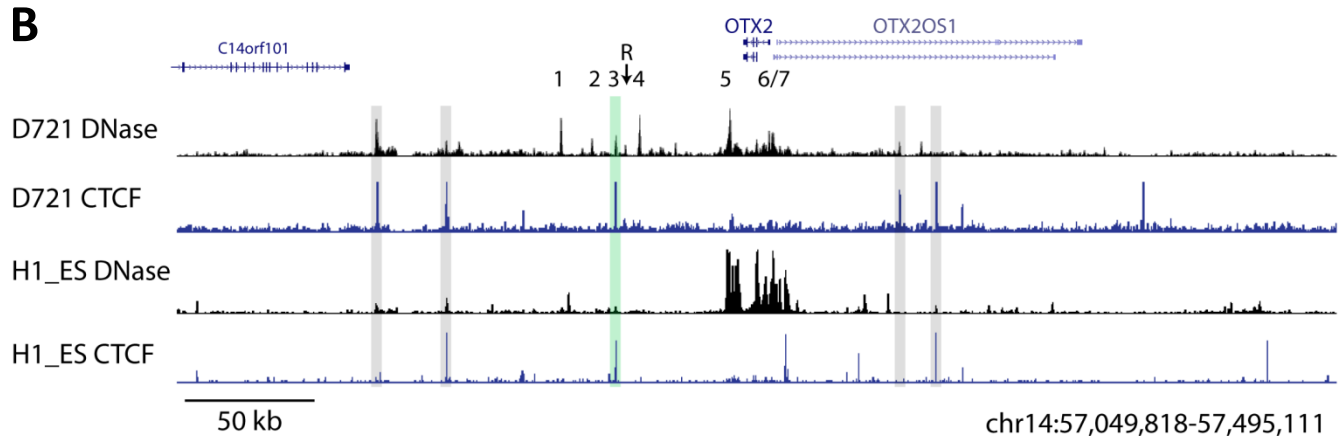

**C**

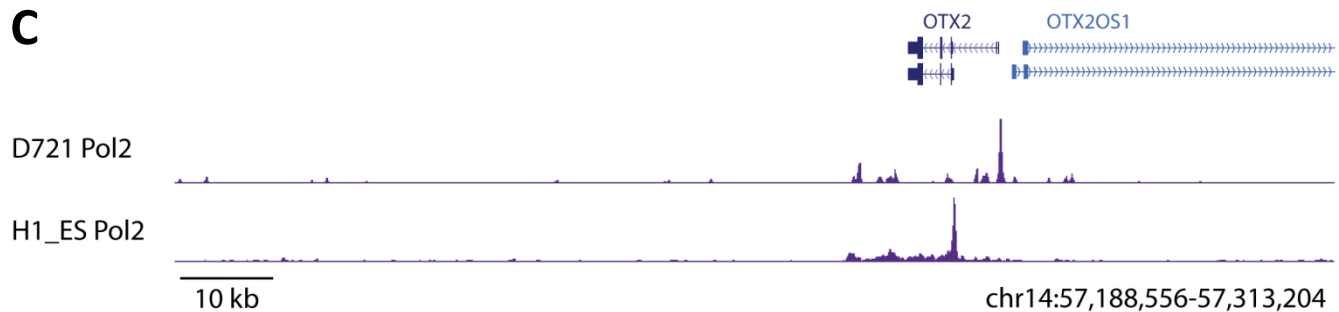

Supplement: Supplementary file 1 [file 1 › Figure_S1.pdf]

# Figure S2

**A**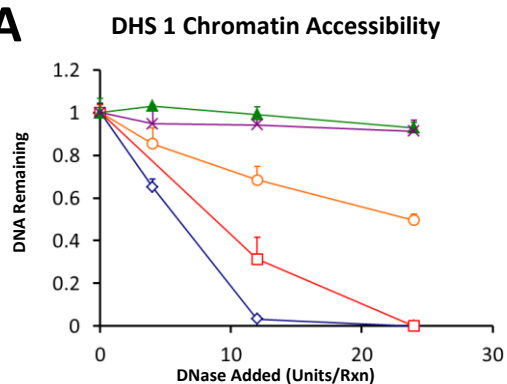**B**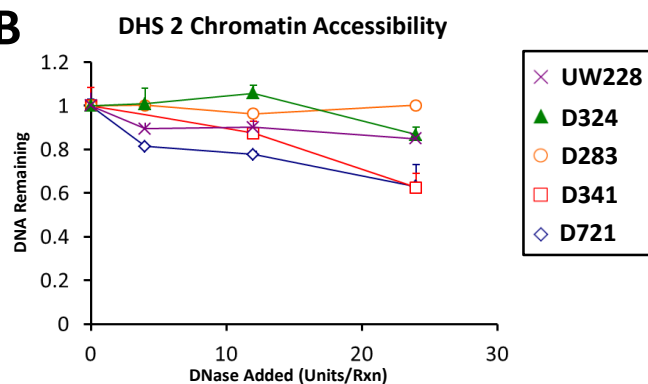**C**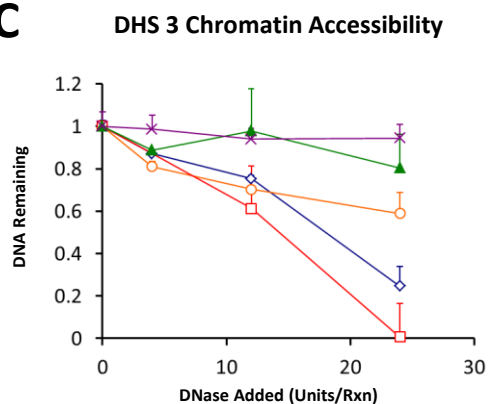**D**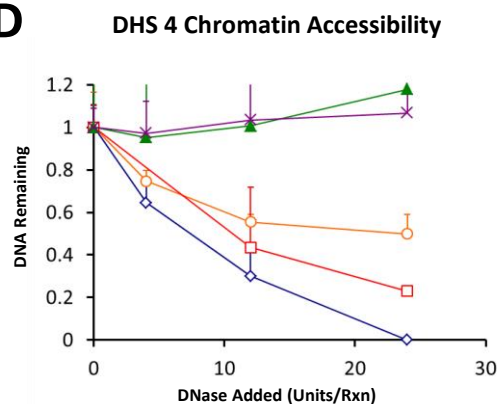**E**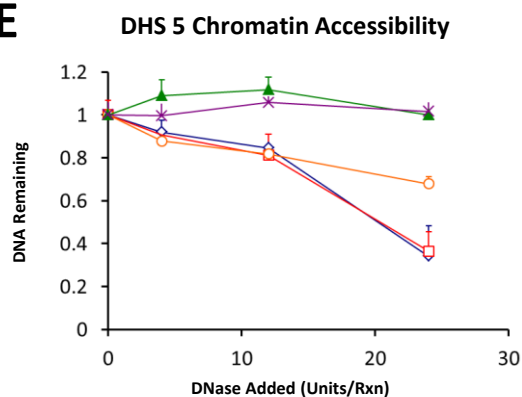**F**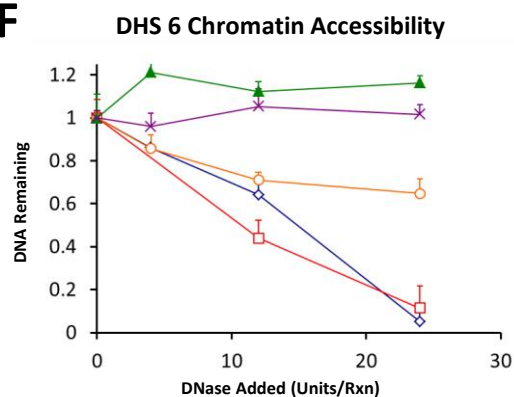**G**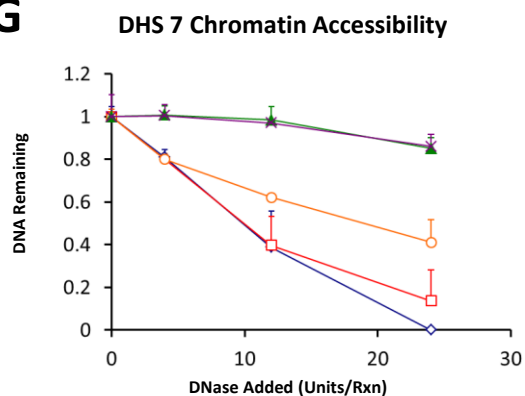**H**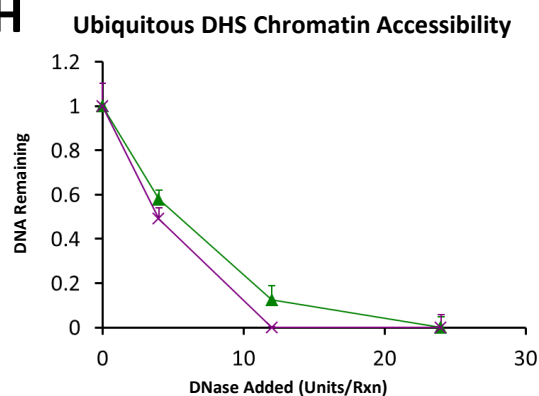

Supplement: Supplementary file 1 [file 1 › Figure_S2.pdf]

# Figure S4

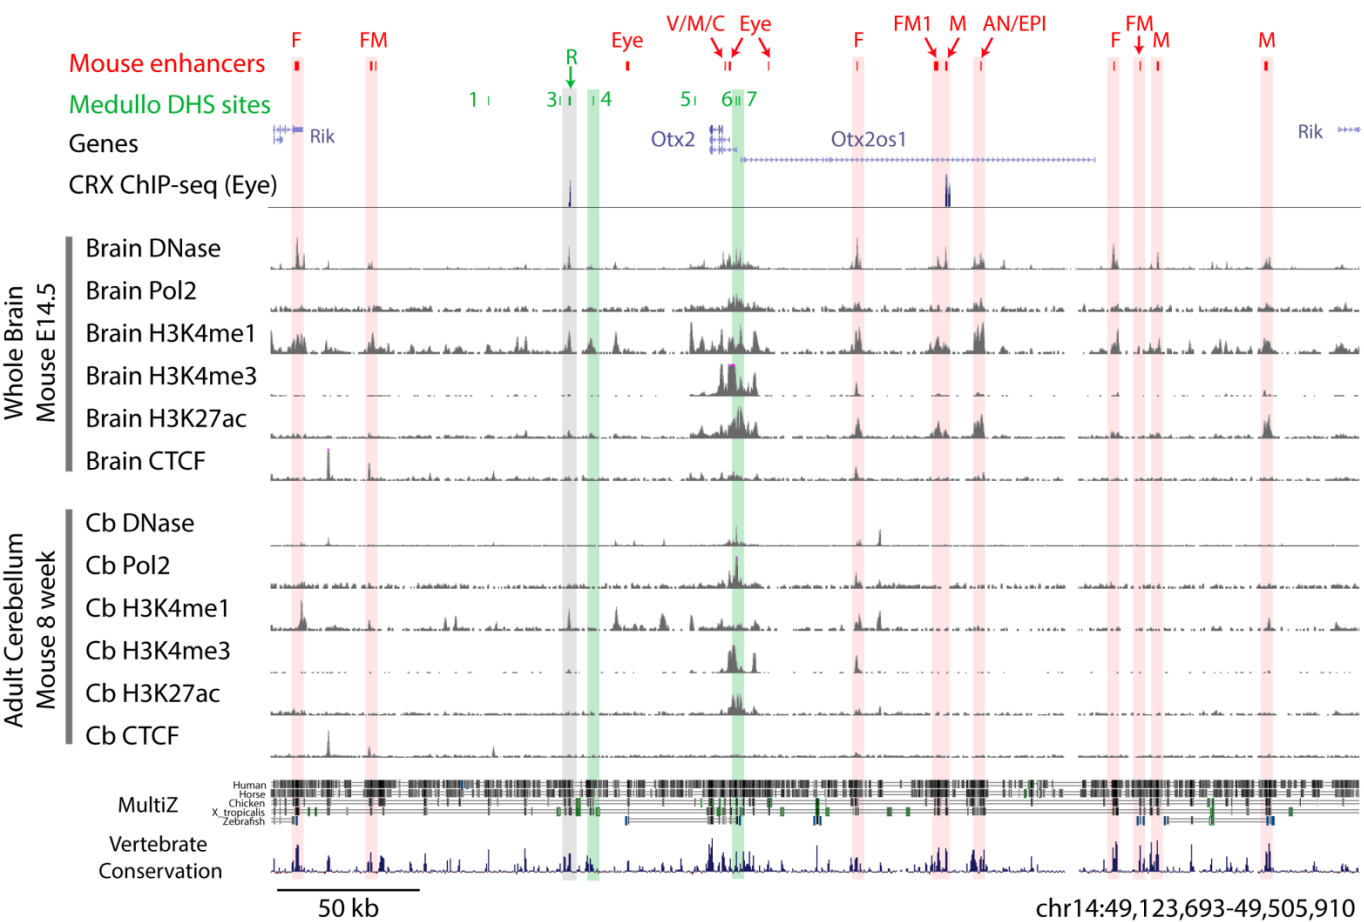

Supplement: Supplementary file 1 [file 1 › Figure_S4.pdf]
